# Supplementary material for: Theoretical understanding and prediction of metal-doped CeO2 catalysts for ammonia dissociation
Source: Royal Society of Chemistry journal article supplement (doi:10.1039/d5cp00430f), 2025-01-01
Supplement: d5cp00430f1.pdf [file d5cp00430f1.pdf]

## Supplementary Information

### Theoretical Understanding and Prediction of Metal-doped CeO<sub>2</sub> Catalyst for Ammonia Dissociation

Yongjie Shen,<sup>a</sup> Kaewraung Wongsathorn,<sup>b</sup> and Min Gao <sup>\*a</sup>

<sup>a</sup>Institute for Chemical Reaction Design and Discovery (WP-ICReDD), Institute for Catalysis Hokkaido University, Sapporo 001-0021, Japan.

<sup>b</sup> Graduate School of Chemical Sciences and Engineering, Hokkaido University, Sapporo 060-8628, Japan.

\*To whom correspondence should be corresponded: [gaomin@icredd.hokudai.ac.jp](mailto:gaomin@icredd.hokudai.ac.jp)

This pdf file includes:

Table S1 to S4 (page S3-S6)

Fig S1 to S12 (pages S7-S18)

## Content

|                                                                                                                                                                                                                                                                                                                          |     |
|--------------------------------------------------------------------------------------------------------------------------------------------------------------------------------------------------------------------------------------------------------------------------------------------------------------------------|-----|
| <b>Table S1</b> $U_{\text{eff}}$ (eV) value of transition metal elements .....                                                                                                                                                                                                                                           | S3  |
| <b>Table S2</b> Distance between the doping metal and oxygen .....                                                                                                                                                                                                                                                       | S4  |
| <b>Table S3</b> Relevant properties calculated by DFT for metal and metal-doped catalysts .....                                                                                                                                                                                                                          | S5  |
| <b>Table S4</b> Adsorption energies of $\text{NH}_3$ -related species on metal-doped $\text{CeO}_2$ .....                                                                                                                                                                                                                | S6  |
| <b>Figure S1</b> Relative energies of Ni-doped, V-doped, and Nb-doped $\text{CeO}_2$ surfaces and the structures of adsorbed species ( $\text{NH}_3$ , $\text{NH}_2\text{-H}$ , $\text{NH}_2\text{-H}$ and $\text{N}_3\text{H}$ ) on the corresponding surfaces at different k-point mesh density .....                  | S7  |
| <b>Figure S2</b> Structural diagrams of pure $\text{CeO}_2$ and $\text{CeO}_2$ doped with different transition metals..                                                                                                                                                                                                  | S8  |
| <b>Figure S3</b> Adsorption structures of $\text{NH}_3$ , $\text{NH}_2\text{-H}$ , $\text{NH}_2\text{-H}$ and $\text{N}_3\text{H}$ on metal (V, Cr, Mn, Fe, and Co)-doped $\text{CeO}_2$ .....                                                                                                                           | S9  |
| <b>Figure S4</b> Adsorption structures of $\text{NH}_3$ , $\text{NH}_2\text{-H}$ , $\text{NH}_2\text{-H}$ and $\text{N}_3\text{H}$ on metal (Ni, Cu, Zn, Nb, Tc, and W)-doped $\text{CeO}_2$ .....                                                                                                                       | S10 |
| <b>Figure S5</b> Valence band maximum as function of the adsorption energies of $\text{NH}_2\text{-H}$ species in $\text{NH}_3$ dissociation.....                                                                                                                                                                        | S11 |
| <b>Figure S6</b> Oxygen vacancy formation as function of the adsorption energies of (a) $\text{NH}_3$ , (b) $\text{NH}_2\text{-H}$ , (c) $\text{NH}_2\text{-H}$ , and (d) $\text{N}_3\text{H}$ species in $\text{NH}_3$ dissociation.....                                                                                | S12 |
| <b>Figure S7</b> Valence band maximum as function of the activation energies for the transition states of (a) $\text{NH}_3 \rightarrow \text{NH}_2\text{-H}$ , (b) $\text{NH}_2\text{-H} \rightarrow \text{NH}_2\text{-H}$ , and (c) $\text{NH}_2\text{-H} \rightarrow \text{N}_3\text{H}$ in $\text{NH}_3$ dissociation | S13 |
| <b>Figure S8</b> Schematic diagram of the interaction between HOMO and LUMO .....                                                                                                                                                                                                                                        | S14 |
| <b>Figure S9</b> The Linear relationship between $\text{NH}_3$ adsorption energy and $\Delta E_{\text{LUMO}(\text{Metal})-\text{HOMO}(\text{N})}$ ....                                                                                                                                                                   | S15 |
| <b>Figure S10</b> Work function as function of the adsorption energies of (a) $\text{NH}_3$ , (b) $\text{NH}_2\text{-H}$ , and (c) $\text{NH}_2\text{-H}$ species in $\text{NH}_3$ dissociation .....                                                                                                                    | S16 |
| <b>Figure S11</b> Valence band maximum as function of the work function.....                                                                                                                                                                                                                                             | S17 |
| <b>Figure S12</b> (a) Valence band maximum, (b) work function, and (c) highest oxidation state as function of the adsorption energies of H .....                                                                                                                                                                         | S18 |
| <b>Reference</b> .....                                                                                                                                                                                                                                                                                                   | S19 |

|                             |           |           |           |           |           |           |           |           |           |           |          |
|-----------------------------|-----------|-----------|-----------|-----------|-----------|-----------|-----------|-----------|-----------|-----------|----------|
| <b>Element</b>              | <b>Sc</b> | <b>Ti</b> | <b>V</b>  | <b>Cr</b> | <b>Mn</b> | <b>Fe</b> | <b>Co</b> | <b>Ni</b> | <b>Cu</b> | <b>Zn</b> | <b>Y</b> |
| <b>U<sub>eff</sub> (eV)</b> | 5.0       | 4.2       | 3.1       | 3.5       | 4.5       | 4.0       | 3.4       | 6.0       | 6.0       | 8.0       | 3.5      |
| <b>Ref</b>                  | 1         | 2         | 3         | 4         | 5         | 6         | 4         | 4         | 7         | 8         | 9        |
| <b>Element</b>              | <b>Zr</b> | <b>Nb</b> | <b>Mo</b> | <b>Tc</b> | <b>Cd</b> | <b>La</b> | <b>Ce</b> | <b>Pr</b> | <b>Nd</b> | <b>Sm</b> | <b>W</b> |
| <b>U<sub>eff</sub> (eV)</b> | 4.0       | 4.0       | 3.5       | -         | 2.0       | 5.0       | 5.0       | 4.5       | 6.0       | -         | 6.2      |
| <b>Ref</b>                  | 10        | 11        | 4         |           | 12        | 13        | 14        | 15        | 16        |           | 17       |

**Table S1** U<sub>eff</sub> (eV) value of transition metal elements.

**Table S2** Distance between the doping metal and oxygen.

|           | Metal-oxygen distance (Å) |            |            |            |            |            |            |
|-----------|---------------------------|------------|------------|------------|------------|------------|------------|
|           | distance1                 | distance 2 | distance 3 | distance 4 | distance 5 | distance 6 | distance 7 |
| <b>V</b>  | 2.131                     | 1.962      | 1.960      | 1.698      | 3.121      | 3.436      | 2.041      |
| <b>Cr</b> | 2.889                     | 1.803      | 1.876      | 1.806      | 2.870      | 3.452      | 1.909      |
| <b>Mn</b> | 2.467                     | 2.636      | 2.110      | 2.812      | 2.098      | 2.390      | 2.208      |
| <b>Fe</b> | 2.633                     | 2.055      | 2.125      | 2.025      | 2.836      | 2.053      | 2.082      |
| <b>Co</b> | 1.780                     | 3.680      | 3.357      | 3.666      | 1.774      | 1.757      | 1.868      |
| <b>Ni</b> | 1.805                     | 1.848      | 1.805      | 3.662      | 3.385      | 3.690      | 1.887      |
| <b>Cu</b> | 1.839                     | 3.705      | 3.324      | 3.684      | 1.837      | 1.841      | 1.878      |
| <b>Zn</b> | 1.997                     | 3.501      | 2.010      | 3.517      | 1.995      | 3.191      | 1.955      |
| <b>Nb</b> | 2.580                     | 1.942      | 2.424      | 1.941      | 2.602      | 1.950      | 2.005      |
| <b>Tc</b> | 2.646                     | 1.790      | 2.745      | 1.787      | 2.694      | 1.757      | 1.903      |
| <b>W</b>  | 2.428                     | 1.837      | 2.399      | 1.837      | 2.869      | 1.825      | 1.924      |

**Table S3** Relevant properties calculated by DFT for metal and metal-doped catalysts.

|           | $E_{\text{SMA}}^a$<br>(eV) | $BG^b$<br>(eV) | $DBC^c$<br>(eV) | $VBM^d$<br>(eV) | $CBM^e$<br>(eV) | $WF^f$<br>(eV) | $E_{\text{dope}}^g$<br>(eV) |
|-----------|----------------------------|----------------|-----------------|-----------------|-----------------|----------------|-----------------------------|
| <b>V</b>  | -6.43                      | 1.21           | -0.27           | -0.51           | 0.70            | 4.96           | 3.39                        |
| <b>Cr</b> | -5.91                      | 1.80           | 0.14            | -1.10           | 0.70            | 5.60           | 4.41                        |
| <b>Mn</b> | -6.82                      | 0.56           | -3.04           | -1.25           | -0.68           | 5.76           | 7.24                        |
| <b>Fe</b> | -5.45                      | 0.93           | -1.69           | -1.16           | -0.23           | 5.76           | 7.29                        |
| <b>Co</b> | -4.71                      | 0.22           | -2.38           | -1.37           | -1.15           | 5.94           | 8.29                        |
| <b>Ni</b> | -2.40                      | 0.34           | -3.16           | -1.43           | -1.09           | 6.17           | 9.03                        |
| <b>Cu</b> | -2.39                      | 0.27           | -3.84           | -1.44           | -1.17           | 6.22           | 10.48                       |
| <b>Zn</b> | -0.79                      | 0.61           | -6.97           | -1.42           | -0.81           | 5.94           | 8.98                        |
| <b>Nb</b> | -7.34                      | 0.43           | -4.14           | 0.33            | 0.76            | 4.35           | 0.96                        |
| <b>Tc</b> | -10.99                     | 0.11           | -3.64           | 0.43            | 0.54            | 4.49           | 5.76                        |
| <b>W</b>  | -13.64                     | 0.55           | -3.20           | 0.22            | 0.77            | 4.39           | 2.64                        |

*A*: the energy of single metal atom. *b*: band gap. *C*: d band center. *D*: valence band maximum. *E*: conduction band minimum. *F*: work function.

*G*: the energy of doping formation.

**Table S4** Adsorption energies of NH<sub>3</sub>-related species on metal-doped CeO<sub>2</sub>.

|           | $E_{\text{NH}_3}$<br>(eV) | $E_{\text{NH}_2\text{-H}}$<br>(eV) | $E_{\text{NH}_2\text{-H}}$<br>(eV) | $E_{\text{N-3H}}$<br>(eV) | $E_{\text{H}}$<br>(eV) |
|-----------|---------------------------|------------------------------------|------------------------------------|---------------------------|------------------------|
| <b>V</b>  | -0.67                     | -1.26                              | -1.41                              | -1.42                     | -3.58                  |
| <b>Cr</b> | -0.54                     | -1.36                              | -1.44                              | -1.47                     | -4.23                  |
| <b>Mn</b> | -1.62                     | -1.81                              | -2.10                              | -1.98                     | -4.96                  |
| <b>Fe</b> | -0.40                     | -1.54                              | -0.70                              | 0.14                      | -5.17                  |
| <b>Co</b> | -1.35                     | -1.47                              | -1.13                              | -1.49                     | -4.94                  |
| <b>Ni</b> | -1.62                     | -1.49                              | -1.76                              | -1.56                     | -5.22                  |
| <b>Cu</b> | -1.09                     | -1.09                              | -1.35                              | -1.66                     | -5.24                  |
| <b>Zn</b> | -1.38                     | -1.48                              | -1.91                              | -1.95                     | -5.09                  |
| <b>Nb</b> | -0.36                     | -0.90                              | -0.22                              | 0.51                      | -3.91                  |
| <b>Tc</b> | 0.23                      | 0.15                               | -0.59                              | -2.48                     | -3.07                  |
| <b>W</b>  | -0.05                     | -0.33                              | -0.29                              | 0.29                      | -3.40                  |

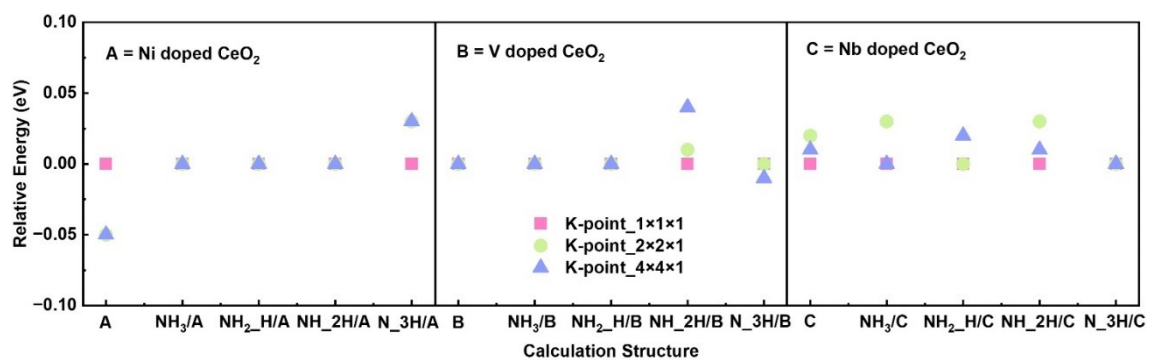

**Figure. S1** Relative energies of Ni-doped, V-doped, and Nb-doped CeO<sub>2</sub> surfaces and the structures of adsorbed species (NH<sub>3</sub>, NH<sub>2</sub>\_H, NH\_2H and N\_3H) on the corresponding surfaces at different k-point mesh density.

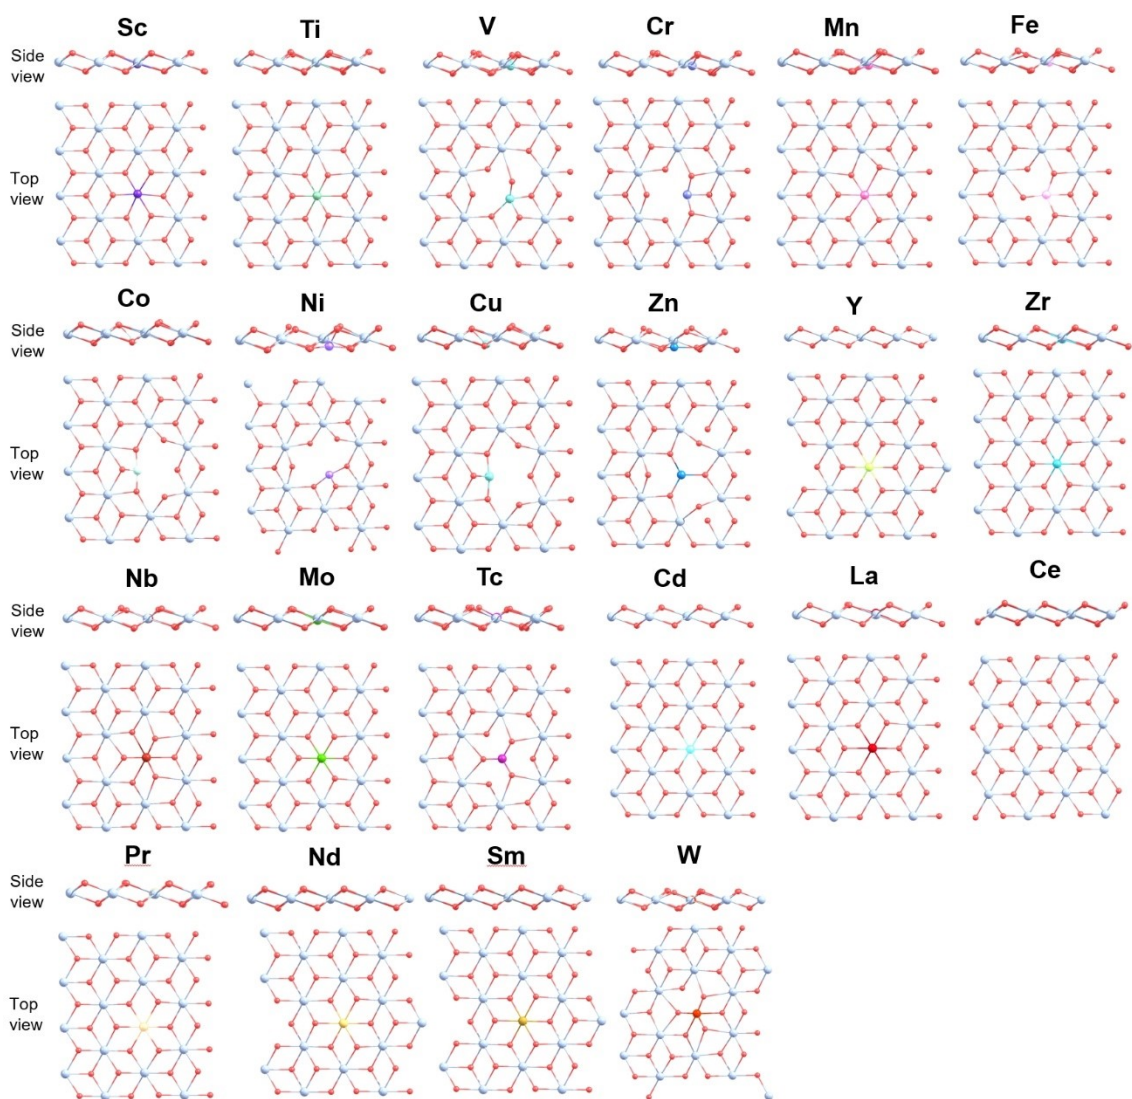

**Figure. S2** Structural diagrams of pure CeO<sub>2</sub> and CeO<sub>2</sub> doped with different transition metals.



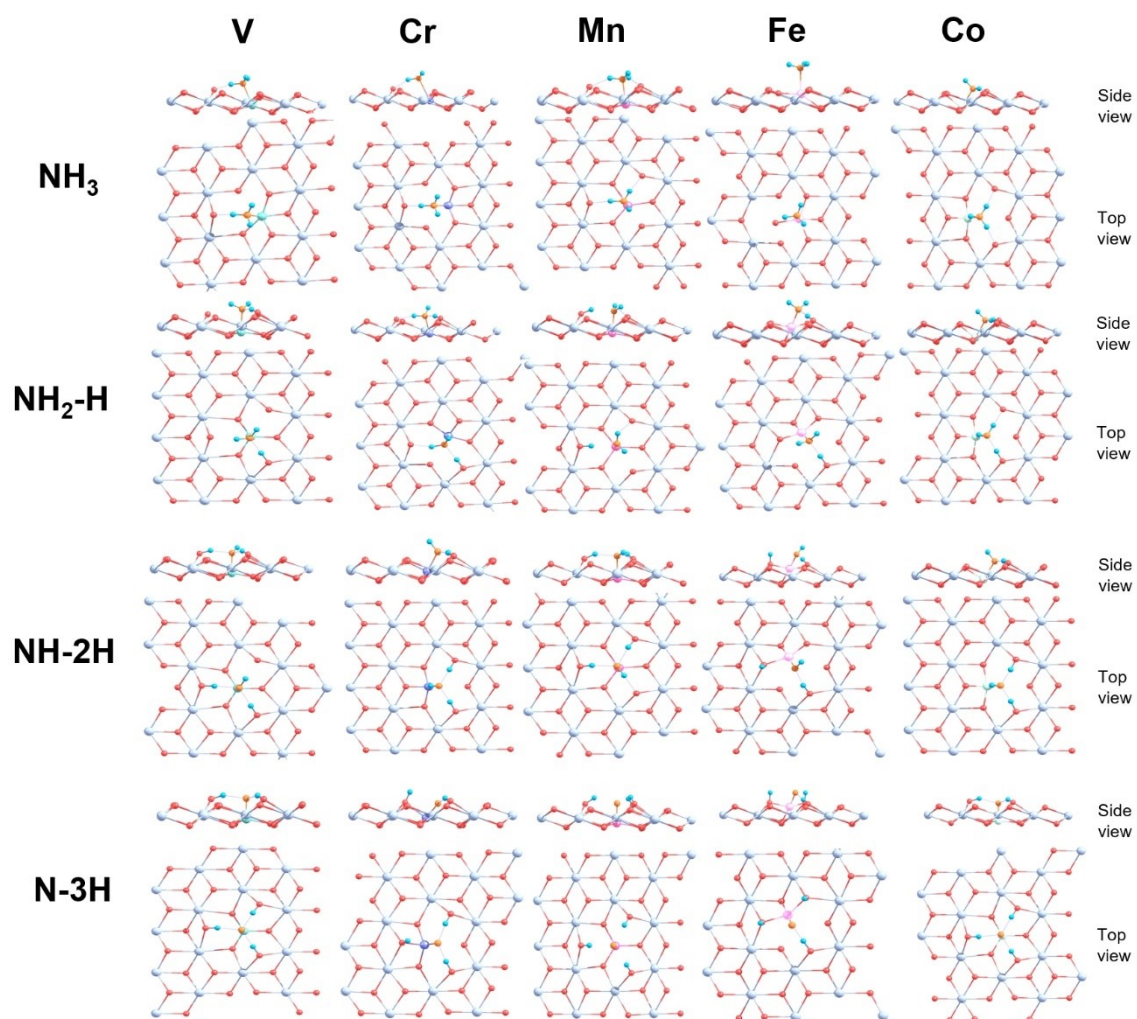

**Figure. S3** Adsorption structures of NH<sub>3</sub>, NH<sub>2</sub>-H, NH-2H and N-3H on metal (V, Cr, Mn, Fe, and Co)-doped CeO<sub>2</sub>.

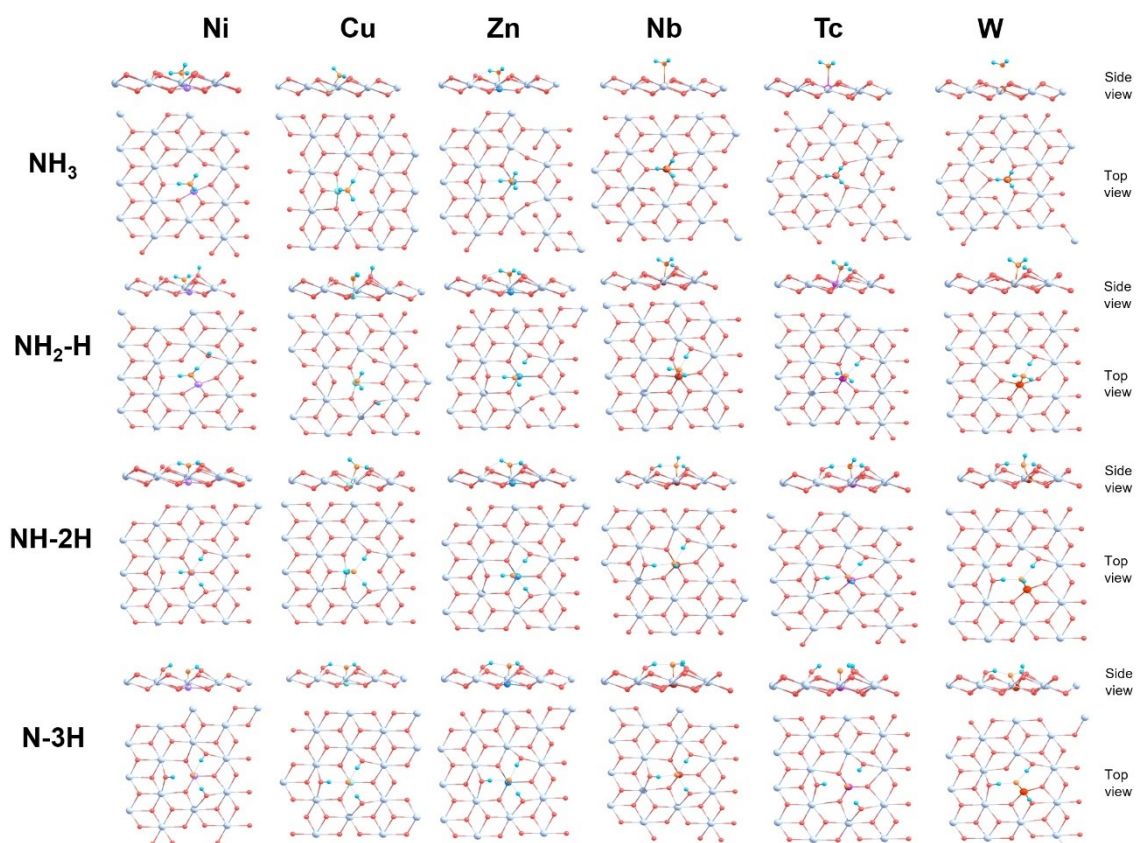

**Figure. S4** Adsorption structures of NH<sub>3</sub>, NH<sub>2</sub>-H, NH-2H and N-3H on metal (Ni, Cu, Zn, Nb, Tc, and W)-doped CeO<sub>2</sub>.

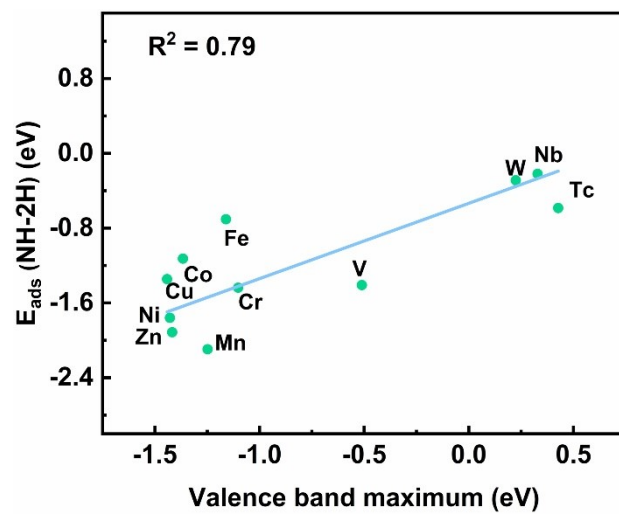

**Figure. S5** Valence band maximum as function of the adsorption energies of NH<sub>2</sub>-H species in NH<sub>3</sub> dissociation.

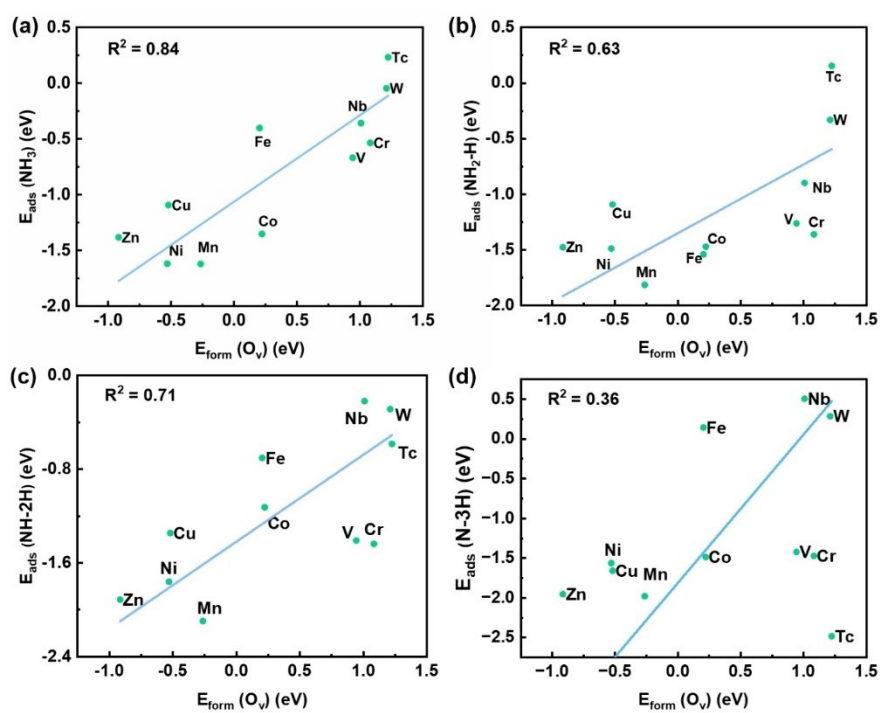

**Figure. S6** Oxygen vacancy formation as function of the adsorption energies of (a)  $\text{NH}_3$ , (b)  $\text{NH}_2\text{-H}$ , (c)  $\text{NH-2H}$ , and (d)  $\text{N-3H}$  species in  $\text{NH}_3$  dissociation.

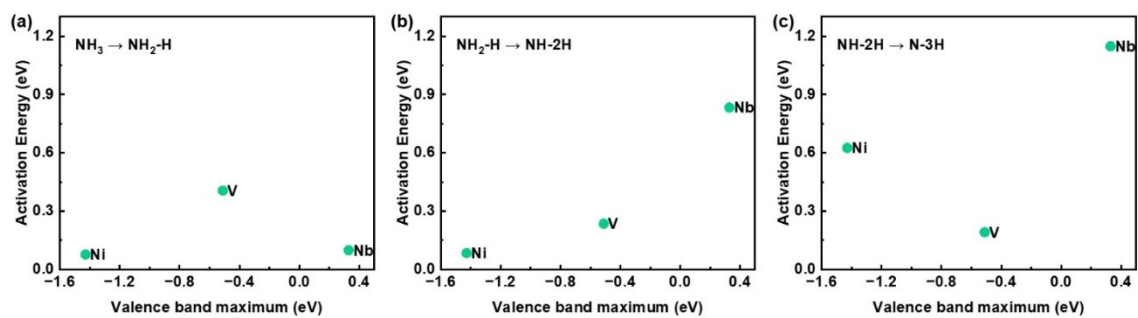

**Figure. S7** Valence band maximum as function of the activation energies for the transition states of (a)  $\text{NH}_3 \rightarrow \text{NH}_2\text{-H}$ , (b)  $\text{NH}_2\text{-H} \rightarrow \text{NH-2H}$ , and (c)  $\text{NH-2H} \rightarrow \text{N-3H}$  in  $\text{NH}_3$  dissociation.

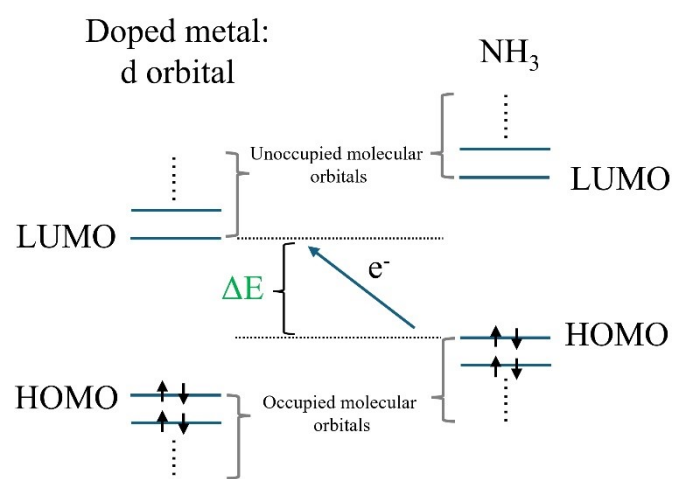

**Figure. S8** Schematic diagram of the interaction between HOMO and LUMO.

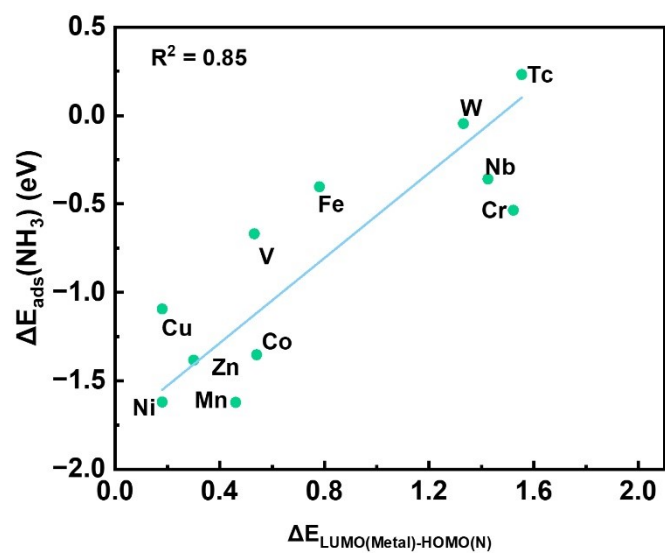

**Figure. S9** The Linear relationship between NH<sub>3</sub> adsorption energy and  $\Delta E_{\text{LUMO}(\text{Metal})-\text{HOMO}(\text{N})}$  (the difference between the LUMO energy of doped metal d orbital and the HOMO energy of N p orbital in NH<sub>3</sub>).

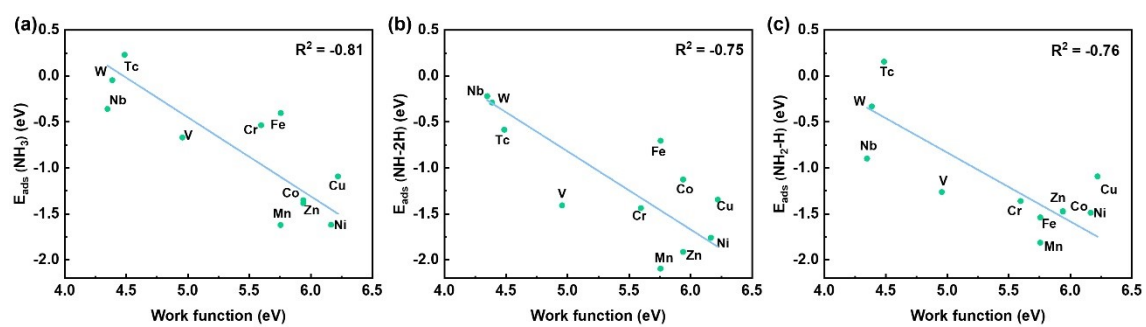

**Figure. S10** Work function as function of the adsorption energies of (a)  $\text{NH}_3$ , (b)  $\text{NH}_2\text{-H}$ , and (c)  $\text{NH}_2\text{-H}$  species in  $\text{NH}_3$  dissociation.



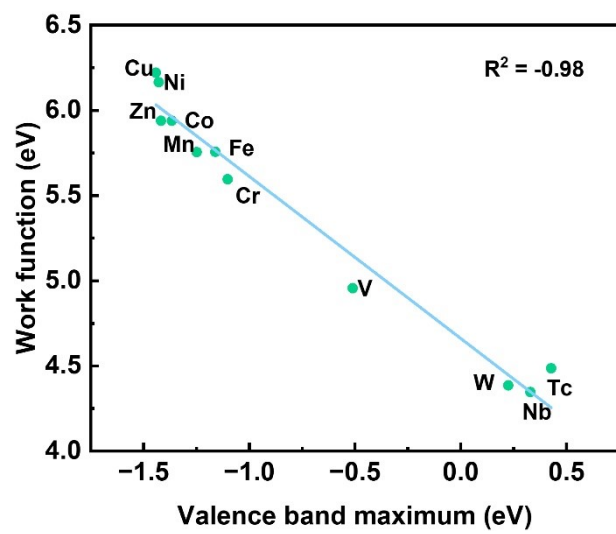

Figure. S11 Valence band maximum as function of the work function.

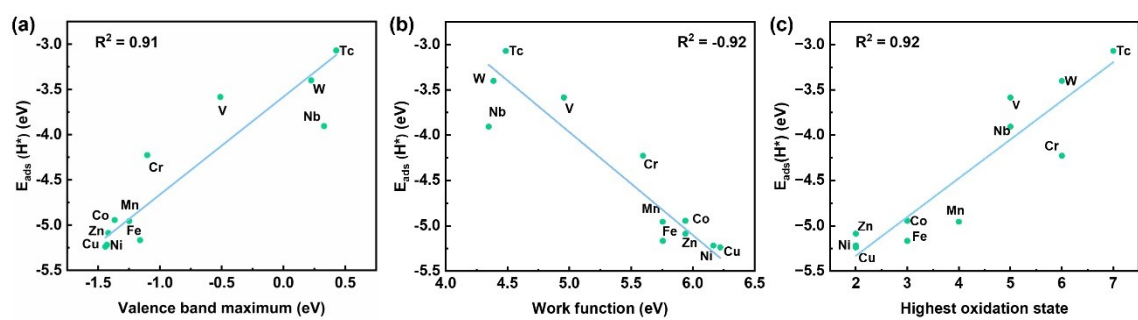

**Figure. S12** (a) Valence band maximum, (b) work function, and (c) highest oxidation state as function of the adsorption energies of H.

- 1 Q. Meng, T. Wang, E. Liu, X. Ma, Q. Ge and J. Gong, *Phys. Chem. Chem. Phys.*, 2013, **15**, 9549-9561.
- 2 F. Liu, H. He, Y. Ding and C. Zhang, *Appl. Catal. B Environ. Energy*, 2009, **93**, 194-204.
- 3 G. Sai Gautam, P. Canepa, A. Abdellahi, A. Urban, R. Malik and G. Ceder, *Chem. Mater.*, 2015, **27**, 3733-3742.
- 4 A. Jain, G. Hautier, S. P. Ong, C. J. Moore, C. C. Fischer, K. A. Persson and G. Ceder, *Phys. Rev. B*, 2011, **84**, 045115.
- 5 W. Song, J. Liu, H. Zheng, S. Ma, Y. Wei, A. Duan, G. Jiang, Z. Zhao and E. J. M. Hensen, *Catal. Sci. Technol.*, 2016, **6**, 2120-2128.
- 6 R. Grau-Crespo, F. Corà, A. A. Sokol, N. H. de Leeuw and C. R. A. Catlow, *Phys. Rev. B*, 2006, **73**, 035116.
- 7 B. Himmetoglu, R. M. Wentzcovitch and M. Cococcioni, *Phys. Rev. B*, 2011, **84**, 115108.
- 8 S. Haffad and K. Korir Kiprono, *Surf. Sci.*, 2019, **686**, 10-16.
- 9 B. Saha, T. D. Sands and U. V. Waghmare, *J. Appl. Phys.*, 2011, **109**, 073720.
- 10 Y. Tang, S. Zhao, B. Long, J.-C. Liu and J. Li, *J. Phys. Chem. C*, 2016, **120**, 17514-17526.
- 11 Y. Fang, D. Cheng, M. Niu, Y. Yi and W. Wu, *Chem. Phys. Lett.*, 2013, **567**, 34-38.
- 12 L. N. Bai, B. J. Zheng, J. S. Lian and Q. Jiang, *Solid State Sciences*, 2012, **14**, 698-704.
- 13 S. Grieshammer, M. Nakayama and M. Martin, *Phys. Chem. Chem. Phys.*, 2016, **18**, 3804-3811.
- 14 Z. Su, X. Li, W. Si, L. Artiglia, Y. Peng, J. Chen, H. Wang, D. Chen and J. Li, *ACS Catal.*, 2023, **13**, 3444-3455.
- 15 B. Milberg, A. Juan and B. Irigoyen, *Appl. Surf. Sci.*, 2017, **401**, 206-217.
- 16 K. O. Obodo, G. Gebreyesus, C. N. M. Ouma, J. T. Obodo, S. O. Ezeonu, D. P. Rai and B. Bouhafs, *RSC Adv.*, 2020, **10**, 15670-15676.
- 17 J. Tao, Q. Zhang and T. Liu, *Phys. Chem. Chem. Phys.*, 2022, **24**, 22918-22927.

## References
